# Supplementary material for: Location of Cerebral Microbleeds May Predict Subsequent Stroke after Transient Ischemic Attack
Source: PubMed Central journal article supplement — J Stroke. 2016 May 31;18(2):236–8. doi: 10.5853/jos.2015.00353 (PMC4901941; doi:10.5853/jos.2015.00353), 2016-05-31
Supplement: jos-2015-00353-supple1.pdf [file jos-2015-00353-supple1.pdf]

**Supplemental Table 1.** Baseline characteristics of the study population

|                                     | No CMBs (n = 457) | Strictly lobar (n = 7) | Strictly deep (n = 23) | Mixed (n = 13) | P value |
|-------------------------------------|-------------------|------------------------|------------------------|----------------|---------|
| Age                                 | 63.9 ± 11.7       | 73.3 ± 13.5            | 69.7 ± 12.3            | 69.3 ± 10.0    | 0.01    |
| Male                                | 262 (57.3)        | 6 (85.7)               | 15 (65.2)              | 8 (61.5)       | 0.46    |
| Hypertension                        | 298 (65.2)        | 4 (57.1)               | 19 (82.6)              | 12 (92.3)      | 0.05    |
| Diabetes                            | 133 (29.1)        | 3 (42.9)               | 7 (30.4)               | 6 (46.2)       | 0.46    |
| Hyperlipidemia                      | 138 (30.2)        | 1 (14.3)               | 14 (60.9)              | 4 (30.8)       | 0.02    |
| Coronary artery disease             | 38 (8.3)          | 0 (0.0)                | 3 (13.0)               | 1 (7.7)        | 0.79    |
| Atrial fibrillation                 | 48 (10.5)         | 2 (28.6)               | 2 (8.7)                | 1 (7.7)        | 0.41    |
| Motor weakness                      | 279 (61.1)        | 4 (57.1)               | 18 (78.3)              | 12 (92.3)      | 0.03    |
| Speech disturbance without weakness | 96 (21.0)         | 2 (28.6)               | 2 (8.7)                | 1 (7.7)        | 0.31    |
| TIA duration                        |                   |                        |                        |                | 0.83    |
| < 10 minutes                        | 100 (21.9)        | 2 (28.6)               | 6 (26.1)               | 2 (15.4)       |         |
| 10–59 minutes                       | 152 (33.3)        | 2 (28.6)               | 10 (43.5)              | 4 (30.8)       |         |
| ≥ 60 minutes                        | 205 (44.9)        | 3 (42.9)               | 7 (30.4)               | 7 (53.8)       |         |
| Crescendo TIA                       | 18 (3.9)          | 2 (28.6)               | 1 (4.3)                | 3 (23.1)       | 0.003   |
| ABCD <sup>2</sup> score             | 4.2 ± 1.4         | 4.3 ± 1.6              | 4.4 ± 1.5              | 5.1 ± 1.4      | 0.19    |
| ABCD <sup>2</sup> score             |                   |                        |                        |                | 0.68    |
| Low (0–3)                           | 134 (29.3)        | 2 (28.6)               | 7 (30.4)               | 2 (15.4)       |         |
| Moderate (4–5)                      | 241 (52.7)        | 4 (57.1)               | 11 (47.8)              | 6 (46.2)       |         |
| High (6–7)                          | 82 (17.9)         | 1 (14.3)               | 5 (21.7)               | 5 (38.5)       |         |
| ABCD <sup>3</sup> -I score          | 4.7 ± 1.6         | 5.1 ± 1.3              | 5.0 ± 1.7              | 6.4 ± 1.9      | 0.006   |
| DWI lesion present                  | 143 (31.3)        | 0 (0.0)                | 5 (21.7)               | 2 (15.4)       | 0.16    |
| Multiple DWI lesions                | 52 (11.4)         | 0 (0.0)                | 4 (17.4)               | 2 (15.4)       | 0.11    |
| Symptomatic steno-occlusion         | 162 (35.4)        | 2 (28.6)               | 12 (52.2)              | 7 (53.8)       | 0.21    |
| Chronic territorial infarct         | 39 (8.5)          | 1 (14.3)               | 4 (17.4)               | 0 (0.0)        | 0.22    |
| Lacune                              | 69 (15.1)         | 3 (42.9)               | 8 (34.8)               | 9 (69.2)       | <0.01   |
| WMHs                                | 132 (28.9)        | 4 (57.1)               | 12 (52.2)              | 11 (84.6)      | <0.01   |
| CMBs, total numbers                 | 0                 | 8.0 ± 9.2              | 3.3 ± 3.3              | 10.9 ± 10.3    | <0.01   |
| Intracerebral hemorrhage            | 8 (1.8)           | 0 (0.0)                | 1 (4.3)                | 1 (7.7)        | 0.21    |
| Antiplatelets                       | 419 (91.7)        | 6 (85.7)               | 21 (91.3)              | 11 (84.6)      | 0.47    |
| Anticoagulation                     | 68 (14.9)         | 3 (42.9)               | 2 (8.7)                | 1 (7.7)        | 0.17    |
| Statin                              | 317 (69.4)        | 5 (71.4)               | 15 (65.2)              | 8 (61.5)       | 0.89    |
| Carotid intervention                | 16 (3.5)          | 0 (0.0)                | 1 (4.3)                | 0 (0.0)        | 0.79    |
| Subsequent stroke                   | 19 (4.2)          | 1 (14.3)               | 1 (4.3)                | 5 (38.5)       | <0.01   |

Numbers represent 'mean and standard deviation' or 'frequency and percentage'. Kruskal-Wallis one-way analysis of variance test was used for the continuous variables, and Fisher's exact test for the categorical variables.

CMBs, cerebral microbleeds; TIA, transient ischemia attack; DWI, diffusion-weighted image; WMH, white matter hyperintensities.
