# Supplementary material for: Location of Cerebral Microbleeds May Predict Subsequent Stroke after Transient Ischemic Attack
Source: PubMed Central journal article supplement — J Stroke. 2016 May 31;18(2):236–8. doi: 10.5853/jos.2015.00353 (PMC4901941; doi:10.5853/jos.2015.00353), 2016-05-31
Supplement: jos-2015-00353-supple2.pdf [file jos-2015-00353-supple2.pdf]

**Supplemental Table 2.** The locations of CMBs according to Microbleed Anatomical Rating Scale

|                                       | Right     | Left      | Total      |
|---------------------------------------|-----------|-----------|------------|
| <b>Lobar</b>                          |           |           |            |
| Subtotal                              | 27        | 29        | 56         |
| Frontal                               | 4         | 5         | 9          |
| Parietal                              | 4         | 2         | 6          |
| Temporal                              | 7         | 12        | 19         |
| Occipital                             | 11        | 9         | 20         |
| Insula                                | 1         | 1         | 2          |
| <b>Deep</b>                           |           |           |            |
| Subtotal                              | 30        | 31        | 61         |
| Basal ganglia                         | 15        | 11        | 26         |
| Thalamus                              | 8         | 16        | 24         |
| Internal capsule                      | 0         | 1         | 1          |
| External capsule                      | 1         | 0         | 1          |
| Corpus callosum                       | 2         | 0         | 2          |
| Deep and periventricular white matter | 4         | 3         | 7          |
| <b>Infratentorial</b>                 |           |           |            |
| Subtotal                              | 15        | 8         | 23         |
| Brainstem                             | 5         | 5         | 10         |
| Cerebellum                            | 10        | 3         | 13         |
| <b>Total</b>                          | <b>72</b> | <b>68</b> | <b>140</b> |

CMBs, cerebral microbleeds
